# Supplementary material
Source: Springer Nature journal article supplement (https://www.springermedizin.de/resource/supplementary/13054_2011_9827_MOESM10_ESM.pdf/9706958)

**Figure 11**

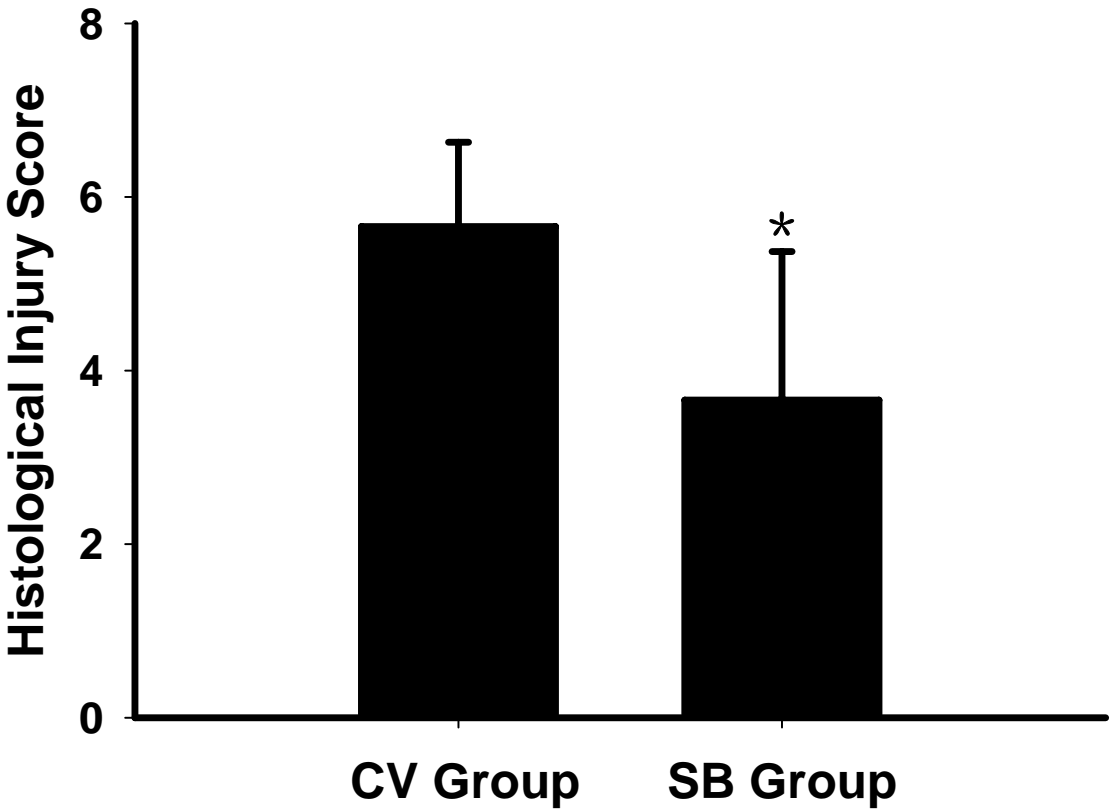

Supplement: MOESM10 [file 9706958]
